# Supplementary material for: Layer Number Dependent Ferroelasticity in 2D Ruddlesden-Popper Organic-inorganic Hybrid Perovskites
Source: Research Square preprint supplement (doi:10.21203/rs.3.rs-109794/v1), 2020-11-30
Supplement: Supplementary file 1 [file c494ab828a2761866f97e748.docx]

**Supplementary Information for**

**Layer Number Dependent Ferroelasticity in 2D Ruddlesden-Popper Organic-inorganic Hybrid Perovskites**

Xun Xiao1, Jian Zhou2, Kepeng Song3, Jingjing Zhao1, Yu Zhou1, Peter Neil Rudd1, Yu Han3, Ju Li2,* and Jinsong Huang1,[[1]](#footnote-1)*

*1 Department of Applied Physical Sciences, University of North Carolina, Chapel Hill, NC 27599, USA.*

*2 Department of Nuclear Science and Engineering and Department of Materials Science and Engineering, Massachusetts Institute of Technology, Cambridge, MA 02139, USA.*

*3 Advanced Membranes and Porous Materials (AMPM) Center, Physical Sciences and Engineering Division, King Abdullah University of Science and Technology (KAUST), Thuwal, Saudi Arabia*

**
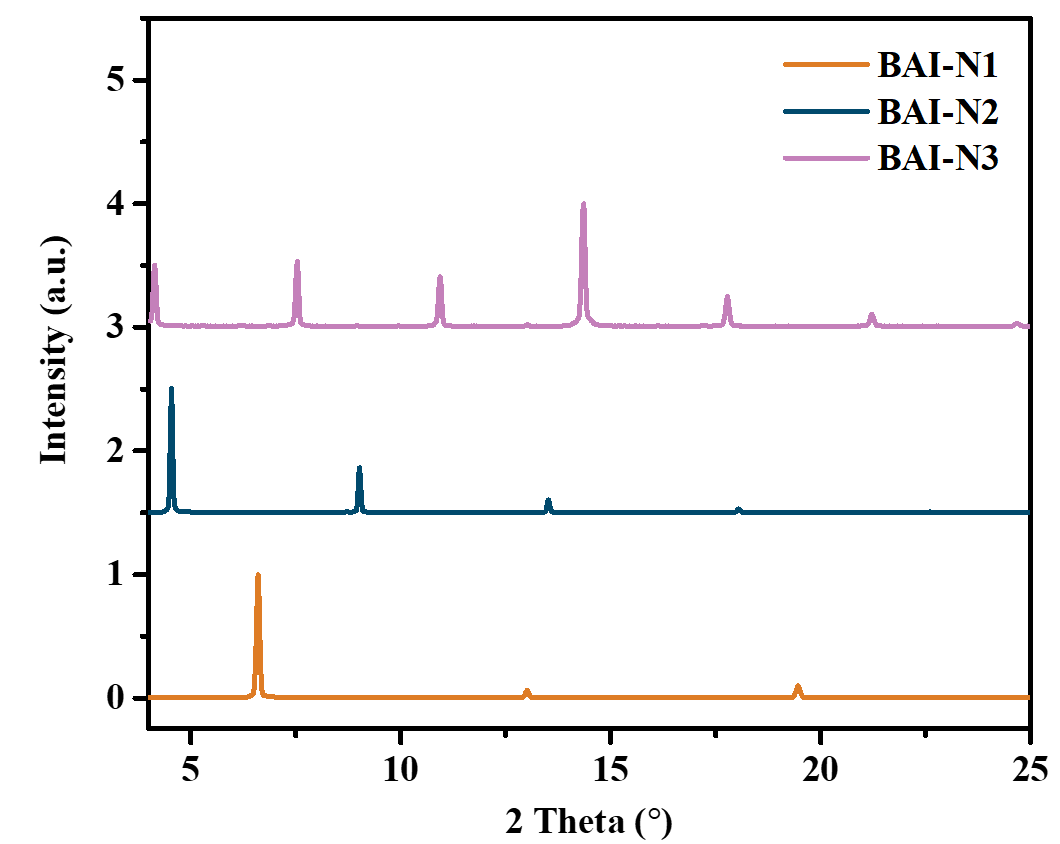
**
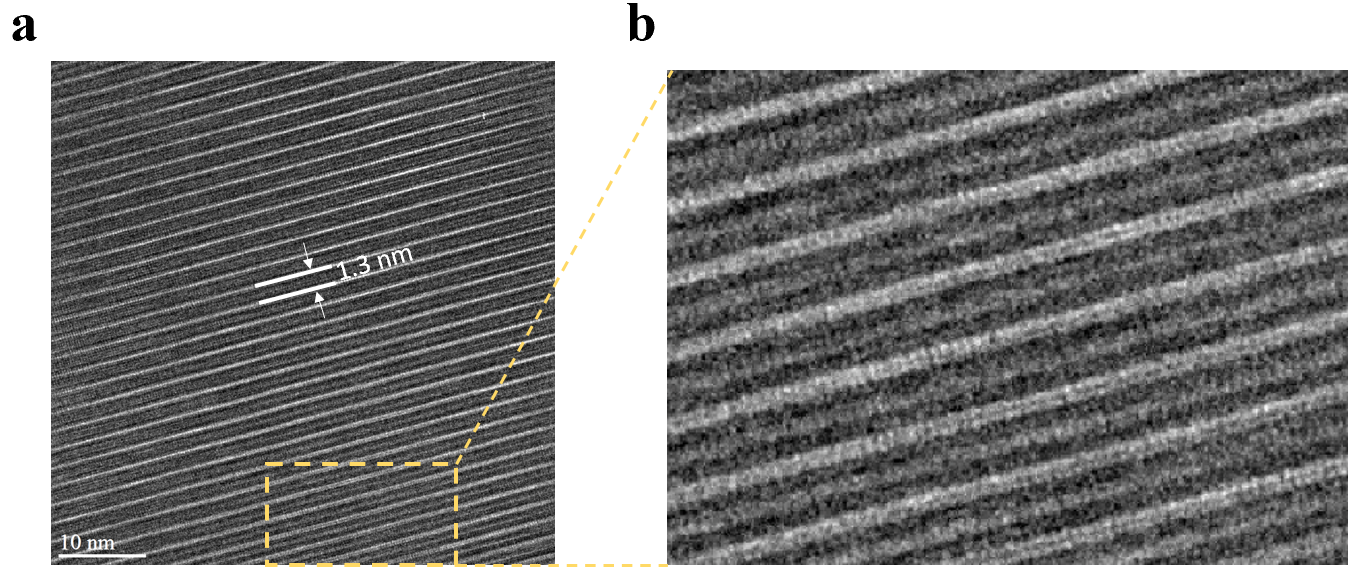
**Supplementary Figure 1:** XRD patterns for BAI-N1, BAI-N2 and BAI-N3 single crystals, respectively.

**Supplementary Figure 2:** (a) Cross section TEM for BAI-N2, (b) is the zoom-in image corresponding to golden rectangular mark in (a).


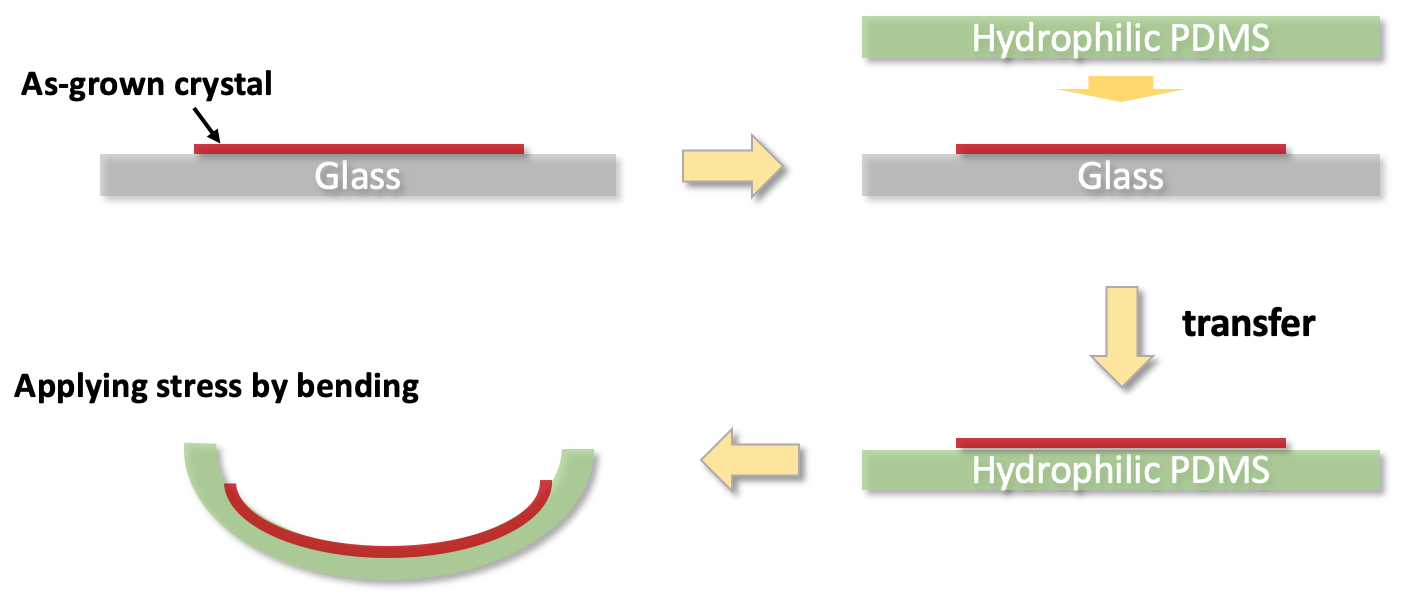


**Supplementary Figure 3:** scheme of applying external stress on layered perovskite crystals

**
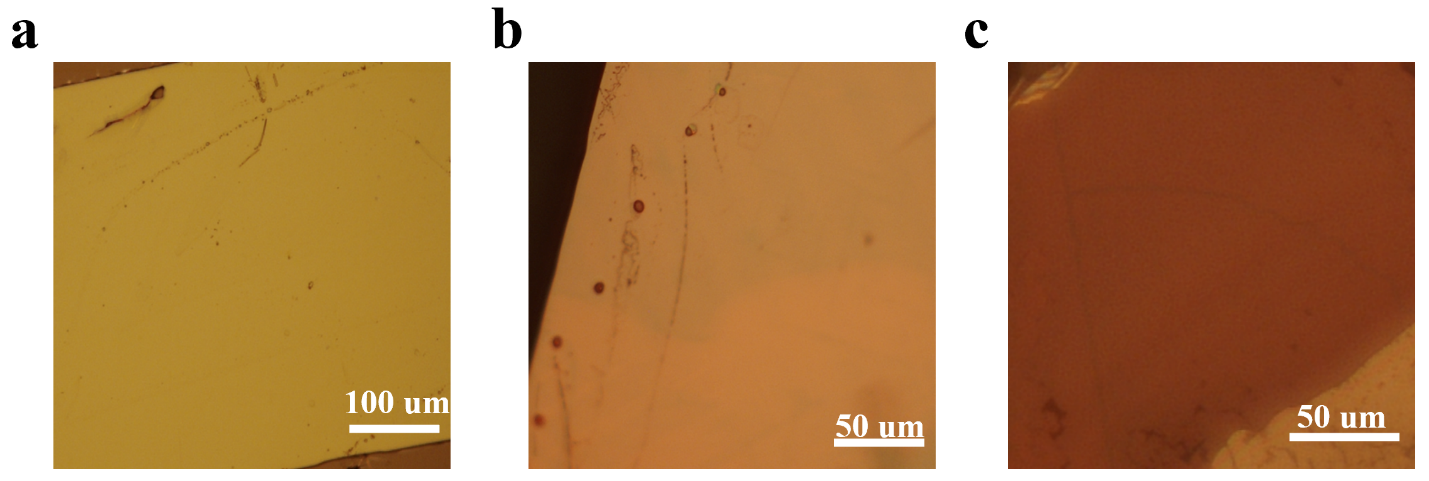
**

**Supplementary Figure 4:** (a), (b) and (c) are non-polarized optical microscope images for BAI-N1, BAI-N2 and BAI-N3 single crystals, respectively.

**Supplementary Note 1:** **DFT calculation models for BAI-N1 and BAI-N2.**

**BAI-N1 (VASP form)**

BAI-N1

1.0000000000

8.55045 0.00000 0.000-0

0.00000 8.55045 0.00000

0.00000 0.00000 27.53405

H C N Pb I

96 32 8 4 16

Direct

0.264512 0.434668 0.722538

0.448592 0.219584 0.732024

0.324343 0.318234 0.808609

0.340386 0.959671 0.806062

0.206742 0.058346 0.881770

0.127183 0.291085 0.504313

0.337771 0.088998 0.511514

0.341462 0.293102 0.419305

0.571102 0.118750 0.418764

0.409909 0.119418 0.340055

0.419348 0.785804 0.234368

0.228105 0.569407 0.230342

0.331166 0.650854 0.311553

0.976041 0.598218 0.316671

0.111149 0.652115 0.398157

0.048159 0.767957 0.025720

0.243944 0.559132 0.002678

0.160509 0.814605 0.928055

0.360865 0.630670 0.895265

0.140022 0.714567 0.839713

0.609833 0.695036 0.719338

0.786989 0.919224 0.724617

0.659479 0.808683 0.800467

0.997433 0.920135 0.816562

0.866364 0.812146 0.892932

0.761190 0.572377 0.506677

0.952090 0.780775 0.505935

0.700299 0.829664 0.427189

0.912974 0.039499 0.433045

0.787302 0.979469 0.352820

0.769325 0.053132 0.237126

0.566141 0.246391 0.238012

0.691376 0.185798 0.320194

0.580734 0.520869 0.301025

0.734967 0.517728 0.378039

0.692234 0.081292 0.019149

0.870840 0.264780 0.986111

0.541370 0.339139 0.946510

0.752064 0.523875 0.917452

0.532423 0.450864 0.860344

0.762813 0.569270 0.723503

0.945431 0.786467 0.732416

0.823515 0.685290 0.809048

0.836008 0.044082 0.807266

0.707277 0.940451 0.883264

0.610521 0.701575 0.505419

0.798131 0.920666 0.508319

0.849973 0.687211 0.424635

0.053816 0.892338 0.423570

0.924781 0.830351 0.341787

0.912681 0.190051 0.236724

0.707522 0.396775 0.229671

0.822490 0.342957 0.310869

0.465221 0.362941 0.321003

0.623280 0.359512 0.400348

0.549459 0.214127 0.025669

0.749394 0.422825 0.004542

0.656385 0.178792 0.927400

0.862369 0.362126 0.896686

0.642470 0.287148 0.839823

0.112177 0.308058 0.718915

0.292039 0.084904 0.723852

0.161505 0.193733 0.799464

0.499857 0.085197 0.816528

0.363233 0.189010 0.892620

0.267538 0.430494 0.502144

0.474526 0.242022 0.500846

0.214193 0.134403 0.430924

0.457477 0.960448 0.439571

0.300242 0.960844 0.363145

0.270406 0.917011 0.234129

0.076512 0.711558 0.234524

0.186074 0.797631 0.315859

0.112326 0.447982 0.305744

0.244021 0.499944 0.385478

0.191871 0.900202 0.020173

0.369817 0.716307 0.986520

0.040077 0.655745 0.944990

0.248481 0.468673 0.914666

0.029530 0.549085 0.858577

0.251155 0.309781 0.675787

0.395661 0.984524 0.895879

0.251564 0.314222 0.550735

0.501798 0.935460 0.349846

0.297626 0.796854 0.186889

0.042839 0.456095 0.394353

0.209424 0.752901 0.060562

0.205596 0.524893 0.825273

0.750020 0.692875 0.676546

0.895676 0.017008 0.896717

0.731159 0.695941 0.553240

0.987761 0.028303 0.344854

0.791335 0.171447 0.189405

0.532966 0.544150 0.390512

0.711008 0.225480 0.060526

0.709320 0.478124 0.827698

0.324028 0.198550 0.739693

0.289042 0.203687 0.793805

0.372390 0.073727 0.821801

0.332849 0.076387 0.875783

0.356264 0.199937 0.492130

0.333240 0.179125 0.437811

0.453709 0.065812 0.416598

0.415331 0.018142 0.364624

0.196060 0.682835 0.246305

0.209830 0.679925 0.301283

0.097512 0.561544 0.324018

0.124360 0.541357 0.378341

0.246567 0.679631 0.988659

0.163140 0.691674 0.940190

0.239834 0.590128 0.901295

0.148921 0.594513 0.853716

0.820736 0.805908 0.740338

0.786935 0.799789 0.794509

0.870105 0.929900 0.822488

0.833354 0.924813 0.876625

0.832735 0.806600 0.493347

0.821816 0.805032 0.438298

0.931826 0.925373 0.415446

0.907565 0.941817 0.360875

0.684595 0.284834 0.248002

0.703294 0.301025 0.302661

0.582922 0.414897 0.323740

0.619576 0.461218 0.375943

0.748576 0.303990 0.989194

0.663118 0.300030 0.940919

0.741831 0.403878 0.902958

0.651690 0.405414 0.855206

0.232763 0.320164 0.712924

0.243822 0.315376 0.513121

0.302030 0.802608 0.224500

0.169601 0.780869 0.025884

0.730615 0.683335 0.713644

0.727652 0.686882 0.515659

0.796039 0.168311 0.227043

0.670836 0.200330 0.025663

0.208855 0.238425 0.125609

0.709777 0.737072 0.124658

0.312015 0.751780 0.612859

0.815755 0.253838 0.612876

0.524211 0.053345 0.134787

0.023966 0.921793 0.134976

0.878726 0.406471 0.119273

0.379588 0.567637 0.117064

0.237507 0.192740 0.009316

0.736560 0.786833 0.008461

0.713027 0.761924 0.243246

0.206622 0.204089 0.244574

0.987130 0.580952 0.615417

0.135188 0.074088 0.613030

0.631025 0.935218 0.615055

0.490350 0.428195 0.613812

0.829992 0.291412 0.495869

0.314673 0.717190 0.495699

0.318421 0.720981 0.730304

0.819519 0.281865 0.730435

**BAI-N2 (VASP form)**

BAI-N2

1.00000000000000

8.51265 0.00000 0.00000

0.00000 8.68462 0.00000

0.00000 0.00000 40.90000

H C N Pb I

120 36 12 8 28

Direct

0.25061 0.43368 0.48401

0.43541 0.22094 0.49147

0.29916 0.32052 0.54169

0.31859 0.96732 0.54068

0.17774 0.06523 0.59089

0.10986 0.28835 0.18262

0.31148 0.08332 0.18376

0.32191 0.29575 0.12333

0.54033 0.10618 0.12198

0.38802 0.14190 0.06850

0.40375 0.78299 0.98786

0.21453 0.56789 0.98748

0.32640 0.65669 0.04107

0.97221 0.59298 0.04668

0.10784 0.66079 0.10071

0.03217 0.77076 0.69521

0.21450 0.55813 0.67907

0.15920 0.81925 0.62924

0.35121 0.62507 0.60830

0.14571 0.72675 0.56886

0.59460 0.69617 0.47962

0.76768 0.91817 0.48510

0.63660 0.80459 0.53531

0.97480 0.91389 0.54790

0.83914 0.80488 0.59854

0.74721 0.57046 0.18127

0.93732 0.77881 0.17941

0.67519 0.81817 0.12801

0.87981 0.03202 0.12949

0.75667 0.95835 0.07570

0.76259 0.05352 0.99215

0.56191 0.24894 0.99369

0.68458 0.17772 0.04817

0.60210 0.51895 0.03870

0.74462 0.48284 0.09187

0.68648 0.08967 0.68872

0.86077 0.27648 0.66614

0.52798 0.32690 0.63810

0.72910 0.52204 0.61910

0.51593 0.43673 0.58006

0.74806 0.57342 0.48348

0.92857 0.78983 0.49067

0.80137 0.68314 0.54122

0.81333 0.03667 0.54134

0.68010 0.93252 0.59191

0.59573 0.69696 0.18219

0.78047 0.91388 0.18184

0.82961 0.68214 0.12559

0.02769 0.89237 0.12402

0.90257 0.81703 0.06950

0.90795 0.18680 0.99035

0.70812 0.39353 0.98848

0.82660 0.32436 0.04262

0.46971 0.37026 0.04868

0.61531 0.33240 0.10292

0.54010 0.21663 0.69296

0.73024 0.42699 0.67731

0.65559 0.17678 0.62607

0.85065 0.37002 0.60551

0.63745 0.28282 0.56653

0.10068 0.30820 0.47901

0.27840 0.08936 0.48458

0.13825 0.19600 0.53438

0.47696 0.09235 0.54845

0.33354 0.19521 0.59874

0.25249 0.42270 0.17916

0.45560 0.22838 0.17704

0.18376 0.14694 0.13027

0.41097 0.95601 0.13272

0.26187 0.98991 0.08026

0.25406 0.91076 0.98844

0.06086 0.70584 0.99077

0.17675 0.79718 0.04452

0.11483 0.44938 0.03995

0.24737 0.51457 0.09313

0.18029 0.89624 0.69104

0.35394 0.70420 0.66970

0.02461 0.67112 0.63892

0.22341 0.47370 0.61949

0.01979 0.57164 0.57973

0.24922 0.31444 0.45184

0.36694 0.99423 0.60133

0.24447 0.30987 0.21228

0.46315 0.95189 0.07232

0.27542 0.78996 0.95670

0.04738 0.46500 0.09970

0.19449 0.75202 0.71852

0.19993 0.53586 0.55923

0.73993 0.69547 0.45174

0.86918 0.00624 0.60163

0.72490 0.69088 0.21310

0.95554 0.01492 0.07026

0.77873 0.16991 0.95969

0.54293 0.52334 0.09878

0.70353 0.23463 0.71604

0.69311 0.47501 0.55865

0.70655 0.37135 0.81672

0.74596 0.09481 0.82126

0.28151 0.88094 0.86468

0.20934 0.61551 0.85510

0.26719 0.91521 0.82147

0.20271 0.64363 0.81469

0.70414 0.38102 0.86059

0.74346 0.10527 0.86209

0.55086 0.28014 0.83923

0.41651 0.78919 0.83721

0.06888 0.72864 0.83898

0.89093 0.18992 0.84087

0.62254 0.70344 0.31064

0.89866 0.77194 0.31145

0.12209 0.30594 0.35335

0.39761 0.23555 0.35313

0.12744 0.30757 0.30943

0.40227 0.23638 0.31227

0.62570 0.70257 0.35456

0.90093 0.77229 0.35230

0.73942 0.56405 0.33210

0.24090 0.44489 0.33223

0.29466 0.10266 0.33205

0.79519 0.90602 0.33209

0.30920 0.20105 0.49551

0.26684 0.20695 0.53162

0.34862 0.08028 0.55126

0.30465 0.08385 0.58741

0.33421 0.19374 0.17148

0.30652 0.18186 0.13484

0.41839 0.06529 0.11911

0.38155 0.03594 0.08316

0.18256 0.68016 0.99799

0.20259 0.68118 0.03493

0.09598 0.56258 0.05148

0.12556 0.55012 0.08817

0.22765 0.67696 0.67014

0.15106 0.69764 0.63689

0.22601 0.59431 0.61095

0.14353 0.60759 0.57796

0.80250 0.80641 0.49547

0.76500 0.79670 0.53177

0.84663 0.92348 0.55140

0.80690 0.91652 0.58774

0.81567 0.80170 0.17175

0.79903 0.79776 0.13476

0.90371 0.91870 0.11843

0.87893 0.92775 0.08156

0.68248 0.28244 0.00023

0.70407 0.29184 0.03706

0.59175 0.40964 0.05221

0.62473 0.43837 0.08834

0.73596 0.30890 0.66765

0.65301 0.29680 0.63488

0.72688 0.40339 0.60940

0.63866 0.39952 0.57696

0.67586 0.31024 0.83924

0.29586 0.83052 0.84035

0.69436 0.68222 0.33236

0.19512 0.32699 0.33180

0.22239 0.32138 0.47661

0.22881 0.31017 0.18707

0.28490 0.79793 0.98196

0.15435 0.77993 0.69515

0.71630 0.68555 0.47659

0.71482 0.68287 0.18784

0.78958 0.16646 0.98497

0.66234 0.20652 0.69277

0.18709 0.69732 0.83717

0.77026 0.16626 0.84095

0.32982 0.21800 0.33234

0.82975 0.79046 0.33204

0.20285 0.24814 0.75810

0.21718 0.24416 0.91849

0.70103 0.75173 0.75911

0.71608 0.74082 0.91857

0.27585 0.75037 0.25231

0.77942 0.24863 0.25210

0.28086 0.75716 0.41099

0.78139 0.25338 0.41089

0.52539 0.06995 0.77015

0.01530 0.94163 0.76785

0.88104 0.43062 0.75023

0.36797 0.58244 0.75832

0.23172 0.18849 0.68102

0.71993 0.79791 0.68156

0.90051 0.42811 0.92319

0.39010 0.56764 0.91265

0.54618 0.06755 0.91338

0.03457 0.92810 0.91619

0.75987 0.73720 0.83952

0.21028 0.19574 0.99673

0.69875 0.77383 0.99735

0.17682 0.27712 0.83844

0.95149 0.57377 0.25985

0.09992 0.06965 0.25140

0.59660 0.93289 0.25129

0.45310 0.42768 0.25945

0.80892 0.29110 0.17413

0.29530 0.70603 0.17412

0.60277 0.93610 0.41261

0.45325 0.42915 0.40512

0.95465 0.57923 0.40527

0.10276 0.07381 0.41233

0.26129 0.80401 0.33175

0.80192 0.29002 0.48928

0.29640 0.71826 0.48940

0.76135 0.20382 0.33164

1. * Correspondence to J.H. (email: [jhuang@unc.edu](mailto:jhuang@unc.edu)) or to J.L. (email: [liju@mit.edu](mailto:liju@mit.edu)) [↑](#footnote-ref-1)
